# Supplementary material for: Determination of Selenium Species in Muscle, Heart, and Liver Tissues of Lambs Using Mass Spectrometry Methods
Source: PubMed Central journal article supplement (PMC7277398; doi:10.3390/ani10050808), 2020-05-07
Supplement: animals-10-00808-s001.pdf [file animals-10-00808-s001.pdf]

## Supplementary materials

Supplementary material associated with this article can be found, in the online version.

**Table 1.** Chemical composition of the concentrate-hay diet with mineral-vitamin mixture in the basal diet (BD) [1] and the control (RO), and experimental diets fed to lambs.

| Specification                                                     | Meadow hay <sup>1</sup>       | Concentrate <sup>1</sup> |                                     |              | Vitamins and mineral premix <sup>2</sup> |
|-------------------------------------------------------------------|-------------------------------|--------------------------|-------------------------------------|--------------|------------------------------------------|
|                                                                   |                               | Barley meal              | Soybean meal                        | Wheat starch |                                          |
| Ingredient, g/kg BD                                               | 360                           | 165                      | 360                                 | 90.0         | 20.0                                     |
| Dry matter (DM), %                                                | 88.4                          | 87.6                     | 89.7                                | 87.3         | –                                        |
|                                                                   |                               | In DM, %                 |                                     |              |                                          |
| Crude protein                                                     | 9.50                          | 9.94                     | 41.8                                | 0.90         | –                                        |
| Crude fiber                                                       | 27.3                          | 2.87                     | 4.34                                | –            | –                                        |
| Crude fat                                                         | 3.40                          | 2.50                     | 2.25                                | 0.09         | –                                        |
| Ash                                                               | 4.85                          | 1.84                     | 6.16                                | 0.12         | –                                        |
| Neutral detergent fiber                                           | 59.2                          | 18.0                     | 18.8                                | –            | –                                        |
| Acid detergent fiber                                              | 32.1                          | 4.61                     | 6.44                                | –            | –                                        |
| Acid detergent lignin                                             | 4.47                          | 1.14                     | 1.49                                | –            | –                                        |
| Gross energy, MJ/kg of DM                                         | 17.1                          | 16.3                     | 17.8                                | 16.7         | –                                        |
| <b>Chemical composition of the control and experimental diets</b> |                               |                          |                                     |              |                                          |
| Specification                                                     | The control diet <sup>3</sup> |                          | The experimental diets <sup>4</sup> |              |                                          |
| Dry matter, g/kg BD                                               | 884                           |                          | 884                                 |              |                                          |
| Crude protein, g/kg DM                                            | 202                           |                          | 202                                 |              |                                          |
| Crude fiber, g/kg DM                                              | 119                           |                          | 119                                 |              |                                          |
| Crude fat <sup>5</sup> , g/kg BD                                  | 21.7                          |                          | 21.7                                |              |                                          |
| Total crude fat <sup>6</sup> , g/kg BD                            | 51.7                          |                          | 51.7                                |              |                                          |
| Ash, g/kg DM                                                      | 42.8                          |                          | 42.8                                |              |                                          |
| Neutral detergent fiber, g/kg DM                                  | 311                           |                          | 311                                 |              |                                          |
| Acid detergent fiber, g/kg DM                                     | 146                           |                          | 146                                 |              |                                          |
| Acid detergent lignin, g/kg DM                                    | 23.3                          |                          | 23.3                                |              |                                          |
| Gross energy, MJ/kg DM <sup>7</sup>                               | 16.8                          |                          | 16.8                                |              |                                          |
| Total gross energy, MJ/kg DM <sup>8</sup>                         | 17.9                          |                          | 17.9                                |              |                                          |

- The concentrations of toxic elements in the basal diet (mg/kg): As,  $1.39 \pm 0.03$ ; Cd,  $0.068 \pm 0.001$ ; Sb,  $0.0155 \pm 0.0015$ ; and Pb,  $0.514 \pm 0.003$ .
- <sup>1</sup>FA profiles in meadow hay, barley meal, soybean meal, and wheat starch were presented in the previous publication [1].
- <sup>2</sup>The concentrations of elements and vitamins in mineral-vitamin mixture were also presented in the previous publication [1].

- <sup>3</sup>The BD supplemented with 3% rapeseed oil (RO).
- <sup>4</sup>The FO diet: the BD supplemented with 2% RO and 1% odourless fish oil (FO); the experimental diets supplemented with antioxidants: the BD supplemented with 2% RO, 1% odourless FO and with the antioxidant(s) (i.e., carnosic acid (CA), selenized-yeast (SeY) or selenate (Se(VI))).
- <sup>5</sup>Crude fat originating from the BD (i.e., meadow hay and concentrate).
- <sup>6</sup>Total crude fat originating from BD and supplemented oils (i.e., RO without or with FO).
- <sup>7</sup>The gross energy of the BD (i.e., meadow hay and the concentrate) without supplementation with RO, FO, CA and Se (as SeY or Se(VI)).
- <sup>8</sup>Total gross energy of the BD supplemented with RO without or with FO and antioxidant(s) (i.e., CA, SeY, or Se(VI)).

RO comprised the following main fatty acids ( $\mu\text{g/g}$  RO): C14:0 56, C16:0 13091, c9C16:1 33, C18:0 5490, c9C18:1 85859, c12C18:1 786, c9c12C18:2 282394, c9c12c15C18:3 74, C20:0 194, c11C20:1 108, C22:0 430 and c15C24:1 61.

FO included the following main fatty acids ( $\mu\text{g/g}$ ): C12:0 82, C14:0 12345, c9C14:1 215, C15:0 477, C16:0 56947, c7C16:1 318, c9C16:1 420,  $\Sigma$ C16:2 15586, C17:0 493, c9C17:1 193, C18:0 9452, c6C18:1 188, c7C18:1 842, c9C18:1 290592, c12C18:1 15834, c14C18:1 159, c9c12C18:2 114512, c9c12c15C18:3 20968, c11C20:1 24206, c7c9c12c15C18:4 473, c11c14C20:2 2270, c8c11c14C20:3 258, c5c8c11c14C20:4 304, c8c11c14c17C20:4 607, C22:0 139, c13C22:1 11036, c11C22:1 1704, c5c8c11c14c17C20:5 6792, c13c16C22:2 95, c7c10c13c16C22:4 144, c15C24:1 397, c7c10c13c16c19C22:5 1560 and c4c7c10c13c16c19C22:6 26570.

The vitamin and mineral mixture was purchased from POLFAMIX OK (Grodzisk Mazowiecki, Poland); 1 kg of vitamin and mineral mixture comprised: 285 g calcium, 16 g phosphorus, 56 g sodium, 42 mg cobalt as carbonate, 10 mg iodine as iodate, 1 g iron as sulphate, 6mg Se as selenite, 0.5 g copper as sulphate, 5.8 g manganese as sulphate, 7.5 g zinc as sulphate; vitamins: A (500,000 IU/kg), D3 (125,000 IU/kg), and E as  $\alpha$ -tocopherol (25,000 IU/kg).

The selenized yeast (SeY; *Se-Saccharomyces cerevisiae*) was donated by Sel-Plex (Alltech In., USA). About 83% of the Se content of selenized yeast (SeY) represents Se in the form of Se-methionine (Se-Met) incorporated into the proteins of *S. cerevisiae*.

## Reference

[1] D. Jaworska, M. Czauderna, W. Przybylski, A.J. Rozbicka-Wieczorek, Sensory quality and chemical composition of meat from lambs fed diets enriched with fish and rapeseed oils, carnosic acid and seleno-compounds, *Meat Sci.* 119 (2016) 185–192. doi:10.1016/j.meatsci.2016.05.003.
